# Supplementary material for: Warm Temperatures Reduce Flower Attractiveness and Bumblebee Foraging
Source: MDPI journal article supplement (doi:10.3390/insects12060493), 2021-05-25
Supplement: s1 [file s1]

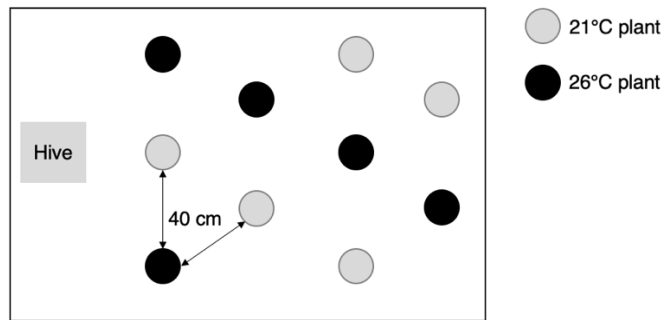

**Figure S1.** Experimental design for bumblebee behavior observations. The black rectangle represents the flight arena where 10 plants were placed.
